# Supplementary material
Source: HighWire-hosted journal article supplement (https://bmjopen.bmj.com/content/12/7/e061655)
Supplement: inline-supplementary-material-2 [file inline-supplementary-material-2.pdf]

## Supplementary material Two

## Systematic Review Search Strategy

1. women.mp. or Women/

2. woman.mp. or Women/

3. Female/

4. 1 or 2 or 3

5. self-management.mp. or Self-Management/

6. 4 and 5

7. qualitative.mp.

8. 6 and 7

9. chronic.mp.

10. long-term.mp.

11. condition.mp.

12. illness.mp.

13. condition.mp.

14. Health/ or health.mp.

15. 9 or 10 or 11 or 12 or 13 or 14

16. 8 and 15

17. barrier\*.mp.

18. facilitator\*.mp.

19. 17 or 18

20. 16 and 19

21. limit 20 to english language

22. limit 21 to yr="2005 -Current"
